# Supplementary material for: Comparison of fruit morphology and nutrition metabolism in different cultivars of kiwifruit across developmental stages
Source: PeerJ. 2021 Jun 23;9:e11538. doi: 10.7717/peerj.11538 (PMC8234916; doi:10.7717/peerj.11538)
Supplement: Supplemental Information 1 [file peerj-09-11538-s001.xlsx]

## Sheet: Figure 1
Weight (g)
Date (DAA)	30	45	60	75	90	105	120	135	150	165
repeat-1	1.38	8.57	11.8	12.54	13.8	15.75	16.05
repeat-2	2.23	8.02	11.33	13.24	13.1	14.91	15.03
repeat-3	1.77	7.8	10.55	11.81	12.74	16.18	15.96
repeat-4	4.62	10.49	13.68	12.97	15.17	16.68	17.12
Kuilv-average	2.5	8.71847	11.8427	12.6398	13.7011	15.8758	16.04
Kuilv-STDEVP	1.26	1.06	1.15	0.54	0.93	0.65	0.74
repeat-1	20.85	26.54	44.71	62.43	55.19	61.39	59.82	62.68
repeat-2	20.84	29.19	46.67	52.95	57.9	65.61	67.6	68.76
repeat-3	20.83	19.84	36.24	49.12	56.7	56.79	63.07	63.1
repeat-4	20.88	28.96	44.02	58.02	64.78	63.3	70.99	70.18
Hongyang-average	20.85	26.128	42.9066	55.6323	58.6411	61.77	65.3713	66.1787
Hongyang-STDEVP	0.02	3.78	3.97	5.04	3.67	3.24	4.26	3.33
repeat-1	21.5	47.65	49.87	62.18	71.64	77.43	69.79	78.27	81.54	79.42
repeat-2	21.5	47.64	64.27	65.63	72.33	75.6	74.71	78.86	71.31	79.35
repeat-3	21.46	47.65	55.47	57.78	57.86	64.08	66.34	70.27	76.94	71.42
repeat-4	21.5	47.67	60.02	73.22	74.14	68.05	86	78.28	86.69	94.97
Harward-average	21.49	47.6521	57.4115	64.7023	68.9903	71.29	74.2079	76.416	79.1243	81.2922
Harward-STDEVP	0.02	0.01	5.35	5.65	6.49	5.45	7.43	3.56	5.68	8.54

## Sheet: Figure 2
Total soluble solid (%)
Date (DAA)	30	45	60	75	90	105	120	135	150	165
repeat-1	3.65	3.69	4.82	5.08	4.4	5.85	8.98
repeat-2	3.52	4.23	4.45	4.6	3.86	5.37	8.44
repeat-3	3.2	3.73	3.95	3.92	4.05	4.87	7.87
repeat-4	4.11	4.47	4.38	4.8	4.89	5.78	8.71
Kuilv-average	3.62	4.03	4.4	4.6	4.3	5.47	8.5
Kuilv-STDEVP	0.334	0.3342	0.31341	0.431	0.393	0.392	0.41095
repeat-1	5.55	4.38	4.25	4.78	4.92	5.09	5.59	8.92
repeat-2	4.93	4.52	4.86	4.33	5.13	5.22	5.37	9.13
repeat-3	4.63	3.81	5.27	3.98	4.24	4.4	4.62	8.07
repeat-4	4.63	3.81	5.27	3.99	5.03	5.21	5.7	9.29
Hongyang-average	4.94	4.13	4.92	4.27	4.83	4.98	5.32	8.85
Hongyang-STDEVP	0.3251	0.324	0.318	0.31298	0.347	0.3431	0.4231	0.4652
repeat-1	4.99	4.33	3.92	4.66	4.49	3.86	5.16	5.69	6.57	7.8
repeat-2	5.03	3.95	4.22	4.06	4.15	4.07	4.98	5.07	6.49	8.37
repeat-3	4.42	4.14	3.95	3.94	3.89	3.36	3.95	4.54	5.54	7.86
repeat-4	5.33	4.78	4.71	4.54	4.66	4.72	4.72	5.5	6.59	8.89
Harward-average	4	4.3	4.2	4.3	4.3	4	4.7	5.2	6.3	8.23
Harward-STDEVP	0.3349	0.312	0.3248	0.3112	0.301393	0.48732	0.4643	0.439	0.4435	0.4424
Dry matter (%)
Date (DAA)	30	45	60	75	90	105	120	135	150	165
repeat-1	6.74	9.92	11.63	13.85	17.55	20.65	24.54
repeat-2	6.74	9.87	10.74	14.46	16.98	19.99	25.12
repeat-3	6.69	9.62	12.07	14.06	16.85	21.22	24.94
repeat-4	6.71	9.94	12.08	14.98	18.7	22.22	25.96
Kuilv-average	6.72	9.84	11.63	14.34	17.52	21.02	25.14
Kuilv-STDEVP	0.02	0.13	0.54	0.43	0.73	0.82	0.52
repeat-1	8.58	8.64	14.01	13.57	16.34	17.58	19.72	20.84
repeat-2	8.38	8.19	13.48	14.55	15.83	18.19	19.18	20.78
repeat-3	7.22	7.81	12.45	14.38	14.43	16.9	18.28	20.48
repeat-4	8.1	9.81	13.86	15.34	15.44	19.29	19.25	22.57
Hongyang-average	8.07	8.61	13.45	14.46	15.51	17.99	19.11	21.17
Hongyang-STDEVP	0.524	0.7452	0.611	0.63432	0.7	0.88	0.52	0.82469
repeat-1	7.1	9.08	11.06	12.97	14.77	14.93	15.23	16.01	15.65	16.05
repeat-2	6.99	9.17	10.63	13.46	14.52	14.71	16.51	16.06	16.29	17.26
repeat-3	7.28	8.73	10.77	12.05	13.4	14.85	16.22	15.15	15.93	15.63
repeat-4	7.27	9.39	11.97	13.8	15.39	16.51	17.24	17.34	17.29	16.83
Harward-average	7.16	9.09	11.11	13.07	14.52	15.25	16.3	16.14	16.29	16.44
Harward-STDEVP	0.12	0.24	0.52	0.66	0.72	0.734	0.72	0.78	0.62	0.64

## Sheet: Figure3
Starch (g.100g-1.FW)
Date (DAA)	30	45	60	75	90	105	120	135	150	165
repeat-1	3.22	3.44	4.76	7.78	9.72	6.26	4.38
repeat-2	3.02	3.49	5.1	7.3	9.54	5.78	4.21
repeat-3	2.46	3.44	4.35	7.26	9.49	5.44	4.49
repeat-4	3.22	4.19	5.22	7.82	10.25	5.76	4.89
Kuilv-average	2.98	3.64	4.86	7.54	9.75	5.81	4.49
Kuilv-STDEVP	0.31	0.32	0.34	0.26	0.3	0.289	0.25
repeat-1	1.35	1.74	3.1	4.7	7.11	8.17	8.17	4.91
repeat-2	1.64	1.86	2.67	4.65	7.27	9.12	7.99	5.31
repeat-3	1.49	1.39	2.65	4.04	6.57	8.34	7.49	4.65
repeat-4	1.8	1.89	3.66	4.85	7.52	8.96	8.27	5.3
Hongyang-average	1.57	1.72	3.02	4.56	7.12	8.65	7.98	5.04
Hongyang-STDEVP	0.17	0.201	0.413	0.31	0.351	0.4031	0.303	0.28
repeat-1	1.44	1.56	3.58	3.47	4.54	7.28	12.71	14.5	6.32	4.27
repeat-2	1.43	1.72	3.28	3.03	4.76	7.62	12.28	14.07	6.13	4.87
repeat-3	1.35	0.93	2.41	2.71	4.43	7.14	12.79	14.57	5.87	4.85
repeat-4	1.49	1.67	3.09	3.51	5.06	7.76	13.42	15.22	6.49	5.45
Harward-average	1.43	1.47	3.09	3.18	4.7	7.45	12.8	14.59	6.2	4.86
Harward-STDEVP	0.05	0.323	0.43	0.33	0.24	0.25	0.41	0.41	0.23	0.42
Glucose (g.100g-1.FW)
Date (DAA)	30	45	60	75	90	105	120	135	150	165
repeat-1	0.02	0.05	0.05	0.23	0.15	0.25	0.31
repeat-2	0.03	0.08	0.06	0.18	0.29	0.24	0.41
repeat-3	0.03	0.08	0.05	0.16	0.22	0.34	0.25
repeat-4	0.05	0.07	0.08	0.26	0.3	0.38	0.35
Kuilv-average	0.0270989	0.0677473	0.0555528	0.210017	0.24389	0.298088	0.325186
Kuilv-STDEVP	0.00623	0.013	0.0123924	0.0432985	0.05529	0.061341	0.061296
repeat-1	0	0.01	0.04	0.06	0.26	0.29	0.75	1.27
repeat-2	0	0.01	0.04	0.06	0.19	0.32	0.79	1.26
repeat-3	0	0.01	0.04	0.05	0.17	0.27	0.77	1.25
repeat-4	0	0.01	0.07	0.08	0.26	0.32	0.97	1.42
Hongyang-average	0.00493933	0.0122667	0.0545128	0.0636534	0.217321	0.30332	0.819004	1.30075
Hongyang-STDEVP	0.00115502	0.0023094	0.00870077	0.0104994	0.0394063	0.0203491	0.0877698	0.0714473
repeat-1	0.02	0.07	0.05	0.06	0.14	0.16	0.23	0.89	1.22	1.23
repeat-2	0.06	0.04	0.03	0.08	0.12	0.15	0.2	0.81	1.16	1.29
repeat-3	0.02	0.02	0.1	0.03	0.07	0.1	0.2	0.72	1.13	1.12
repeat-4	0.06	0.07	0.1	0.14	0.15	0.19	0.3	0.89	1.26	1.33
Harward-average	0.0431173	0.0495849	0.0689877	0.079767	0.116417	0.15091	0.228522	0.830008	1.18788	1.23747
Harward-STDEVP	0.01824	0.018642	0.0286578	0.0367492	0.03484	0.025836	0.044758	0.0662574	0.0521486	0.0796864
Fructose (g.100g-1.FW)
Date (DAA)	30	45	60	75	90	105	120	135	150	165
repeat-1	0.03	0.06	0.09	0.23	0.3	0.34	0.32
repeat-2	0.03	0.07	0.09	0.17	0.27	0.3	0.28
repeat-3	0.03	0.05	0.12	0.13	0.17	0.19	0.36
repeat-4	0.03	0.07	0.06	0.32	0.22	0.33	0.36
Kuilv-average	0.0304942	0.0649658	0.0901567	0.205504	0.235998	0.291683	0.326155
Kuilv-STDEVP	0.00143242	0.0122524	0.021314	0.067	0.052234	0.0623423	0.0319314
repeat-1	0.01	0.03	0.08	0.13	0.22	0.37	1.06	1.12
repeat-2	0.01	0.03	0.06	0.13	0.19	0.46	0.97	1.16
repeat-3	0.01	0.03	0.06	0.09	0.2	0.4	0.91	1
repeat-4	0.01	0.03	0.08	0.14	0.27	0.53	1.15	1.12
Hongyang-average	0.0147733	0.0266667	0.0745558	0.115159	0.218037	0.438739	1.01963	1.09514
Hongyang-STDEVP	0.00229411	0.00184752	0.0148309	0.020121	0.0336164	0.0604208	0.0940207	0.0597637
repeat-1	0.02	0.01	0.01	0.01	0.12	0.16	0.27	0.63	0.86	1.04
repeat-2	0.02	0.01	0.01	0.01	0.08	0.17	0.26	0.73	0.91	0.88
repeat-3	0.02	0.01	0.01	0.01	0.11	0.14	0.19	0.48	1.01	0.97
repeat-4	0.02	0.01	0.05	0.01	0.17	0.17	0.24	0.65	1.1	1.23
Harward-average	0.0176874	0.0110546	0.0174663	0.0265311	0.121601	0.159186	0.23878	0.62348	0.968385	1.0325
Harward-STDEVP	0.001235	0.001235	0.0163411	0.00314234	0.0313386	0.0134895	0.0323275	0.09429	0.0912509	0.128035
Sucrose (g.100g-1.FW)
Date (DAA)	30	45	60	75	90	105	120	135	150	165
repeat-1	0.02	0.06	0.1	0.18	0.23	0.35	0.68
repeat-2	0.02	0.07	0.06	0.2	0.24	0.34	0.74
repeat-3	0.02	0.05	0.11	0.23	0.22	0.34	0.71
repeat-4	0.02	0.1	0.08	0.23	0.27	0.41	0.71
Kuilv-average	0.0239269	0.069122	0.0930489	0.206037	0.241927	0.358903	0.70983
Kuilv-STDEVP	0.00025	0.0150212	0.0151025	0.0156575	0.015033	0.0273	0.0206175
repeat-1	0.01	0.04	0.11	0.22	0.31	0.33	0.38	0.47
repeat-2	0.03	0.05	0.12	0.29	0.3	0.36	0.36	0.5
repeat-3	0.01	0.02	0.09	0.24	0.27	0.35	0.34	0.44
repeat-4	0.03	0.04	0.2	0.29	0.32	0.35	0.4	0.55
Hongyang-average	0.0195692	0.0426667	0.125345	0.256831	0.304452	0.350311	0.370909	0.490179
Hongyang-STDEVP	0.0119421	0.0122202	0.0418472	0.0333619	0.0190061	0.0127773	0.0235868	0.0418558
repeat-1	0	0.02	0.06	0.01	0.02	0.07	0.1	0.07	0.11	0.19
repeat-2	0	0.02	0.05	0.02	0.11	0.02	0.05	0.09	0.16	0.16
repeat-3	0	0.01	0.02	0.06	0.03	0.11	0.09	0.1	0.11	0.11
repeat-4	0	0.03	0.07	0.06	0.08	0.12	0.16	0.18	0.14	0.18
Harward-average	0.0046925	0.0159842	0.0479525	0.0389614	0.0599406	0.0779227	0.1009	0.113887	0.131869	0.158843
Harward-STDEVP	0.0011	0.00934	0.01753	0.01513	0.04374	0.036578	0.0365321	0.04152	0.02143	0.03148

## Sheet: Figure 4
Titratable acid (%)
Date (DAA)	30	45	60	75	90	105	120	135	150	165
repeat-1	0.73	1	1.25	1.85	1.87	1.57	1.38
repeat-2	0.77	0.96	1.29	1.73	1.77	1.61	1.44
repeat-3	0.71	0.92	1.14	1.68	1.83	1.63	1.46
repeat-4	0.79	1.05	1.29	1.73	1.9	1.63	1.6
Kuilv-average	0.75	0.98	1.24	1.75	1.84	1.61	1.47
Kuilv-STDEVP	0.03	0.045	0.055	0.06	0.045	0.02	0.078
repeat-1	0.81	0.8	1.12	1.33	1.35	1.33	1.53	1.62
repeat-2	0.65	0.83	1.12	1.31	1.28	1.27	1.58	1.46
repeat-3	0.67	0.78	1.03	1.17	1.33	1.21	1.47	1.42
repeat-4	0.79	0.86	1.06	1.28	1.44	1.4	1.62	1.62
Hongyang-average	0.73	0.82	1.08	1.27	1.35	1.3	1.55	1.53
Hongyang-STDEVP	0.065	0.025	0.035	0.055	0.06	0.07	0.06	0.085
repeat-1	0.7	1.36	1.29	1.17	1.12	1.58	1.49	1.49	1.49	1.49
repeat-2	0.61	1.36	1.2	1.2	1.07	1.5	1.56	1.5	1.51	1.44
repeat-3	0.74	1.36	1.2	1.15	1.05	1.64	1.34	1.4	1.42	1.39
repeat-4	0.83	1.36	1.31	1.2	1.15	1.64	1.44	1.53	1.58	1.48
Harward-average	0.72	1.36	1.25	1.18	1.1	1.59	1.46	1.48	1.5	1.45
Harward-STDEVP	0.08	0.001	0.045	0.015	0.04	0.043	0.0752	0.047	0.062	0.038
Quinic acid (g.100g-1.FW)
Date (DAA)	30	45	60	75	90	105	120	135	150	165
repeat-1	1.21	0.94	0.79	0.49	0.4	0.35	0.28
repeat-2	1.12	0.9	0.71	0.43	0.44	0.34	0.3
repeat-3	1.08	0.83	0.79	0.34	0.38	0.34	0.28
repeat-4	1.08	0.93	0.82	0.34	0.41	0.41	0.38
Kuilv-average	1.121	0.898	0.777	0.395	0.412	0.36	0.308
Kuilv-STDEVP	0.046	0.042	0.043	0.064	0.023	0.036	0.035
repeat-1	1.36	1.23	1.17	0.96	1.01	0.78	0.7	0.79
repeat-2	1.35	1.28	1.18	0.95	1.02	0.75	0.7	0.76
repeat-3	1.42	1.32	1.11	0.91	1	0.73	0.63	0.74
repeat-4	1.44	1.33	1.22	0.99	1.08	0.77	0.69	0.79
Hongyang-average	1.394	1.29	1.17	0.95	1.031	0.758	0.682	0.772
Hongyang-STDEVP	0.035	0.037	0.038	0.028	0.026	0.022	0.03	0.02
repeat-1	1.3	1.16	0.83	0.73	0.75	0.68	0.48	0.78	0.82	0.58
repeat-2	1.22	1.06	0.85	0.67	0.83	0.77	0.54	0.82	0.8	0.58
repeat-3	1.13	0.98	0.74	0.66	0.64	0.73	0.46	0.76	0.81	0.58
repeat-4	1.3	1.12	0.94	0.81	0.74	0.87	0.55	0.84	0.97	0.58
Harward-average	1.242	1.078	0.84	0.723	0.74	0.758	0.51	0.8	0.85	0.58
Harward-STDEVP	0.074	0.069	0.072	0.06	0.068	0.074	0.042	0.03	0.07	0.001
Malic acid (g.100g-1.FW)
Date (DAA)	30	45	60	75	90	105	120	135	150	165
repeat-1	0.56	0.67	0.4	0.21	0.27	0.1	0.14
repeat-2	0.58	0.72	0.42	0.25	0.25	0.12	0.12
repeat-3	0.52	0.64	0.37	0.19	0.23	0.11	0.12
repeat-4	0.54	0.74	0.41	0.23	0.29	0.15	0.14
Kuilv-average	0.547	0.687	0.4	0.22	0.258	0.12	0.128
Kuilv-STDEVP	0.0154	0.04113	0.023	0.024	0.02401	0.018	0.01205
repeat-1	0.42	0.6	0.42	0.27	0.29	0.29	0.27	0.29
repeat-2	0.42	0.6	0.47	0.26	0.27	0.27	0.28	0.24
repeat-3	0.39	0.58	0.37	0.26	0.27	0.27	0.24	0.22
repeat-4	0.45	0.66	0.45	0.29	0.29	0.29	0.29	0.29
Hongyang-average	0.423	0.611	0.43	0.271	0.275	0.28	0.265	0.26
Hongyang-STDEVP	0.023	0.031	0.041	0.0134	0.01	0.01	0.021	0.031
repeat-1	0.25	0.32	0.34	0.24	0.26	0.3	0.22	0.19	0.21	0.17
repeat-2	0.32	0.31	0.27	0.27	0.24	0.3	0.25	0.26	0.22	0.18
repeat-3	0.28	0.27	0.23	0.27	0.23	0.27	0.27	0.14	0.14	0.22
repeat-4	0.35	0.35	0.28	0.27	0.23	0.29	0.27	0.29	0.19	0.22
Harward-average	0.3	0.309	0.28	0.26	0.24	0.29	0.248	0.223	0.186	0.198
Harward-STDEVP	0.036	0.03	0.041	0.008	0.0084	0.0132	0.021	0.063	0.032	0.024
Citric acid (g.100g-1.FW)
Date (DAA)	30	45	60	75	90	105	120	135	150	165
repeat-1	0.38	0.46	0.52	0.62	0.89	1.07	0.95
repeat-2	0.4	0.4	0.47	0.59	0.92	1.08	0.86
repeat-3	0.44	0.38	0.5	0.58	0.87	0.96	0.86
repeat-4	0.45	0.4	0.55	0.65	0.95	1.16	0.97
Kuilv-average	0.423	0.409	0.51	0.613	0.912	1.069	0.91
Kuilv-STDEVP	0.025	0.03425	0.034	0.027	0.03	0.067	0.054
repeat-1	0.1	0.11	0.23	0.24	0.46	0.63	0.64	0.88
repeat-2	0.08	0.14	0.26	0.27	0.53	0.54	0.61	0.76
repeat-3	0.08	0.09	0.28	0.19	0.47	0.56	0.71	0.68
repeat-4	0.1	0.14	0.32	0.3	0.58	0.63	0.76	0.84
Hongyang-average	0.092	0.122	0.267	0.249	0.505	0.59	0.68	0.787
Hongyang-STDEVP	0.0088	0.0208	0.0308	0.0384	0.0488	0.0352	0.056	0.0804
repeat-1	0.09	0.09	0.29	0.47	0.5	0.49	0.66	0.89	0.96	0.9
repeat-2	0.09	0.09	0.29	0.48	0.44	0.42	0.73	0.9	0.83	0.92
repeat-3	0.09	0.09	0.29	0.48	0.49	0.59	0.66	0.84	0.86	0.82
repeat-4	0.09	0.09	0.29	0.52	0.58	0.59	0.83	0.92	0.91	0.96
Harward-average	0.089	0.092	0.285	0.49	0.502	0.515	0.719	0.892	0.894	0.896
Harward-STDEVP	0.002	0.002	0.002	0.022	0.048	0.068	0.07	0.032	0.046	0.05452
VC (g.100g-1.FW)
Date (DAA)	30	45	60	75	90	105	120	135	150	165
repeat-1	175.32	238.39	207.13	187.5	126.58	126.07	112.36
repeat-2	179.68	236.94	209.77	190.63	130.36	122.42	111.13
repeat-3	172.87	223.8	195.06	179.37	127.91	119.74	124.75
repeat-4	195.85	244.35	206.73	191.86	139.11	132.01	102.93
Kuilv-average	180.93	235.87	204.67	187.34	130.99	125.06	112.79
Kuilv-STDEVP	8.95	7.5	5.67	4.87	4.88	4.6	7.8
repeat-1	160.72	174.28	169.64	94.6	103.85	90.92	104.68	78.35
repeat-2	161.25	169.25	170.17	92.13	108.83	84.35	98.69	85.4
repeat-3	156.24	154.17	166.8	83.67	90.74	81.7	94.45	77.67
repeat-4	174.14	177.15	176.02	100	119.89	94.8	108.34	90.66
Hongyang-average	163.09	168.71	170.66	92.6	105.83	87.94	101.54	83.02
Hongyang-STDEVP	6.67381	8.85947	3.3519	5.8861	10.4675	5.19433	5.3519	5.3519
repeat-1	62.28	61.02	52.96	50.34	47.89	75.35	53.44	59.13	45.48	49.96
repeat-2	62.62	61.16	52.82	57.38	47.59	61.3	61.82	49.61	33.35	36.17
repeat-3	49.19	53.08	46.92	46.05	53.97	55.22	53.93	58.99	33.88	33.16
repeat-4	54.91	68.46	63.59	61.99	64.43	63.93	70.33	68.08	47.54	43.51
Harward-average	57.25	60.93	54.07	53.94	53.47	63.95	59.88	58.95	40.06	40.7
Harward-STDEVP	5.5814	5.43508	6.00701	6.16279	6.82222	7.30004	6.89316	6.52968	6.49333	6.54328

## Sheet: Figure 5
SOD (U.g-1.FW.min-1)
X-axis	Kuilv	Hongyang	Hayward
repeat-1	13.8692	50.2837	36.4505
repeat-2	16.4668	46.2029	31.8163
repeat-3	14.42	45.93	32.48
repeat-4	15.92	48.67	35.17
average	15.169	47.7716	33.9792
STDEVP	1.06052	1.80069	1.90071
POD (U.g-1.FW.min-1)
X-axis	Kuilv	Hongyang	Hayward
repeat-1	136.5	93.38	102
repeat-2	128.33	93.56	82.1667
repeat-3	128.35	84.44	43.76
repeat-4	136.5	103.3	84.75
average	132.42	93.67	78.1692
STDEVP	4.08001	6.67132	21.279
CAT (U.g-1.FW.min-1)
X-axis	Kuilv	Hongyang	Hayward
repeat-1	5.08125	13.2489	46.83
repeat-2	7.7235	7.22667	31.83
repeat-3	6.28	8.58	34.76
repeat-4	8.28	12.06	49.06
average	6.84119	10.2789	40.62
STDEVP	1.2511	2.45945	7.43978
